# Supplementary material
Source: PubMed Central journal article supplement (PMC4719122)
Supplement: NIHMS749765-supplement-Supplement.pdf [file NIHMS749765-supplement-Supplement.pdf]

1 Dimethylamine as a Major Alkyl Amine Species in Particles and Cloud Water: Observations in  
2 Semi-Arid and Coastal Regions

3

4 *J.-S. Youn<sup>1</sup>, E. Crosbie<sup>2</sup>, L. C. Maudlin<sup>2</sup>, Z. Wang<sup>3</sup>, A. Sorooshian<sup>1,2,3\*</sup>*

5 <sup>1</sup>Mel and Enid Zuckerman College of Public Health, University of Arizona, Tucson, AZ, USA

6 <sup>2</sup>Department of Atmospheric Sciences, University of Arizona, Tucson, AZ, USA

7 <sup>3</sup>Department of Chemical and Environmental Engineering, University of Arizona, Tucson, AZ,  
8 USA

9 \*Corresponding author: Armin Sorooshian (E-mail: armin@email.arizona.edu; Postal Address:  
10 PO BOX 210011, Tucson, Arizona, 85721, USA)

11 Supporting Information Summary: 3 Pages including Cover Page, 1 Figure

12

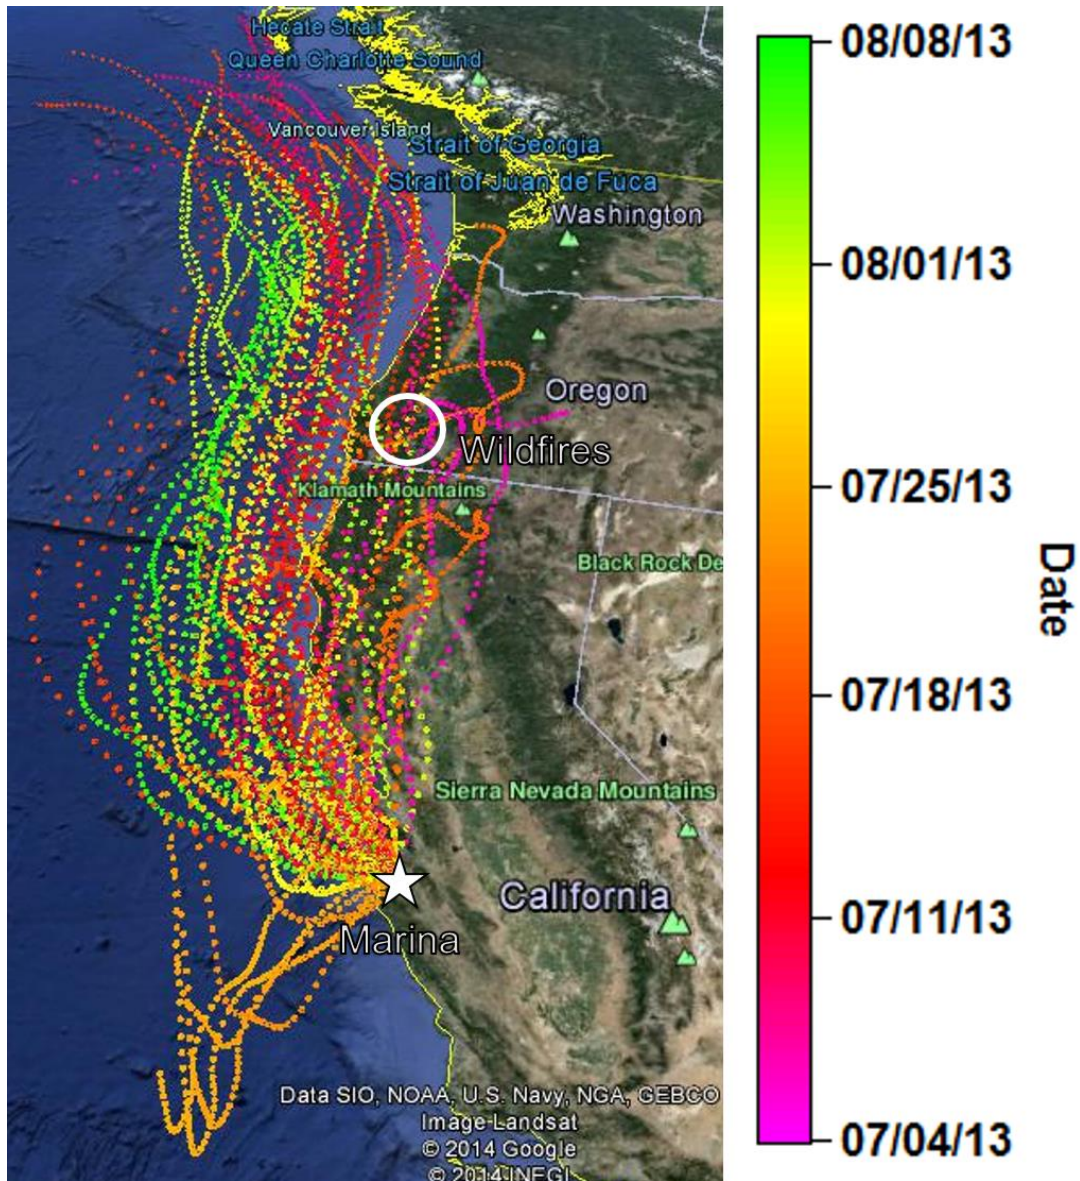

13

14

15 **Figure S1.** Three-day air mass back-trajectories computed with the NOAA HYSPLIT model  
 16 (Draxler and Rolph, 2012), colored by the final date (UTC) of the trajectory arriving at the  
 17 MOUDI measurement site in Marina, California. The area where the wildfires (Big Windy,  
 18 Whiskey Complex, and Douglas Complex) occurred is circled in white. Transport time of the  
 19 smoke plumes to Marina is estimated to be ~47 hours on average during NiCE. Figure adopted  
 20 from Maudlin et al. (2015).

21 References

- 22 Draxler, R. R., Rolph, G. D., 2012. HYSPLIT (HYbrid Single-Particle Lagrangian Integrated  
23 Trajectory) Model access via NOAA ARL READY Website  
24 (<http://ready.arl.noaa.gov/HYSPLIT.php>); NOAA Air Resources Laboratory: Silver Spring, MD.  
25
- 26 Maudlin, L. C., Wang, Z., Jonsson, H. H., and Sorooshian, A., 2015. Impact of wildfires on size-  
27 resolved aerosol composition at a coastal California site, Atmos. Environ., in press.
